# Supplementary material for: SGIP1 modulates kinetics and interactions of the cannabinoid receptor 1 and G protein‐coupled receptor kinase 3 signalosome
Source: PubMed Central journal article supplement — J Neurochem. 2022 Jan 11;160(6):625–42. doi: 10.1111/jnc.15569 (PMC9306533; doi:10.1111/jnc.15569), 2022-01-11
Supplement: JNC-160-625-s001.pdf [file JNC-160-625-s001.pdf]

**SGIP1 modulates kinetics and interactions of the cannabinoid receptor 1 and G protein-coupled receptor kinase 3 signalosome**

## **Supplementary material**

Matej Gazdarica<sup>1,2</sup>, Judith Noda<sup>1</sup>, Oleh Durydivka<sup>1</sup>, Vendula Novosadova<sup>3</sup>, Ken Mackie<sup>4</sup>, Jean-Philippe Pin<sup>2</sup>, Laurent Prezeau<sup>2,5</sup>, Jaroslav Blahos<sup>1,5</sup>

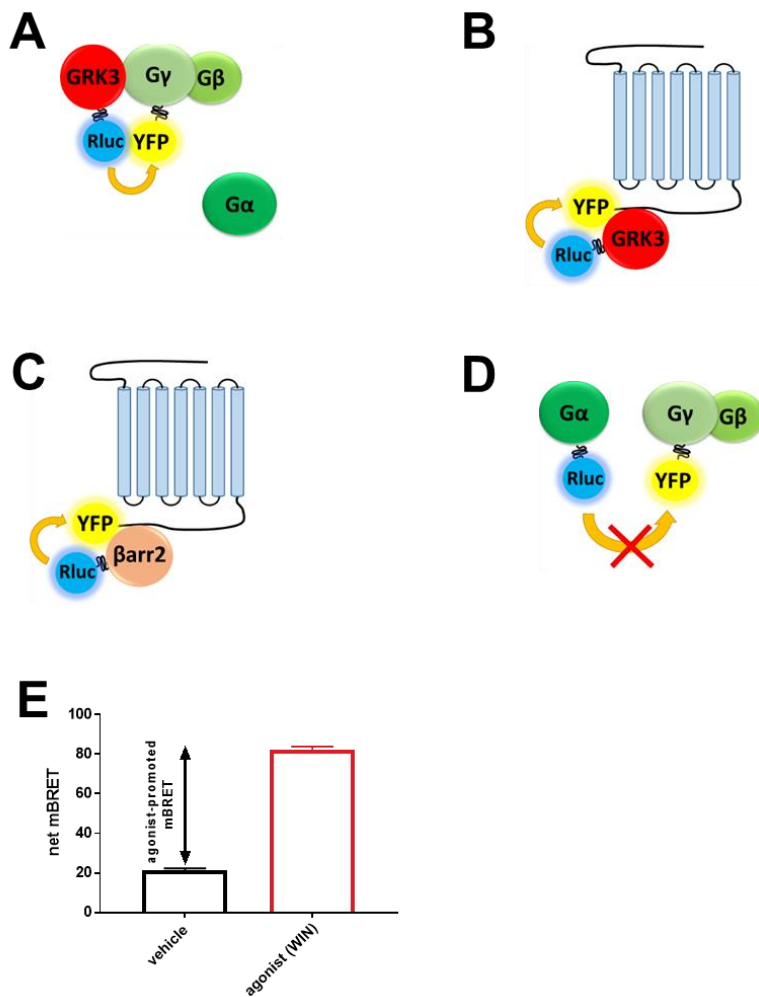

**Suppl. Fig. 1. BRET-based sensors used in the study.** **A)** Schematic representation of GRK3-Rluc8 with G $\gamma$ -YFP complexes formation generating an increase in BRET signal. **B)** Schematic representation of GRK3-Rluc8 recruitment to CB1R-YFP upon CB1R activation. The formation of GRK3-CB1R complexes is observed as an increase in BRET signal efficiency. **C)** Schematic representation of the recruitment of  $\beta$ -arrestin2-Rluc by the activated CB1R-YFP generating an increase in BRET signal. **D)** Schematic representation of the activation of heterotrimeric G proteins which is observed as a decrease in BRET signal due to dissociation/conformational change of G $\alpha_i$  from G $\beta\gamma$  subunits. **E)** Agonist-promoted mBRET was calculated by subtracting the BRET ratio obtained in the absence of agonist from the one obtained following agonist application and multiplied by 1000.

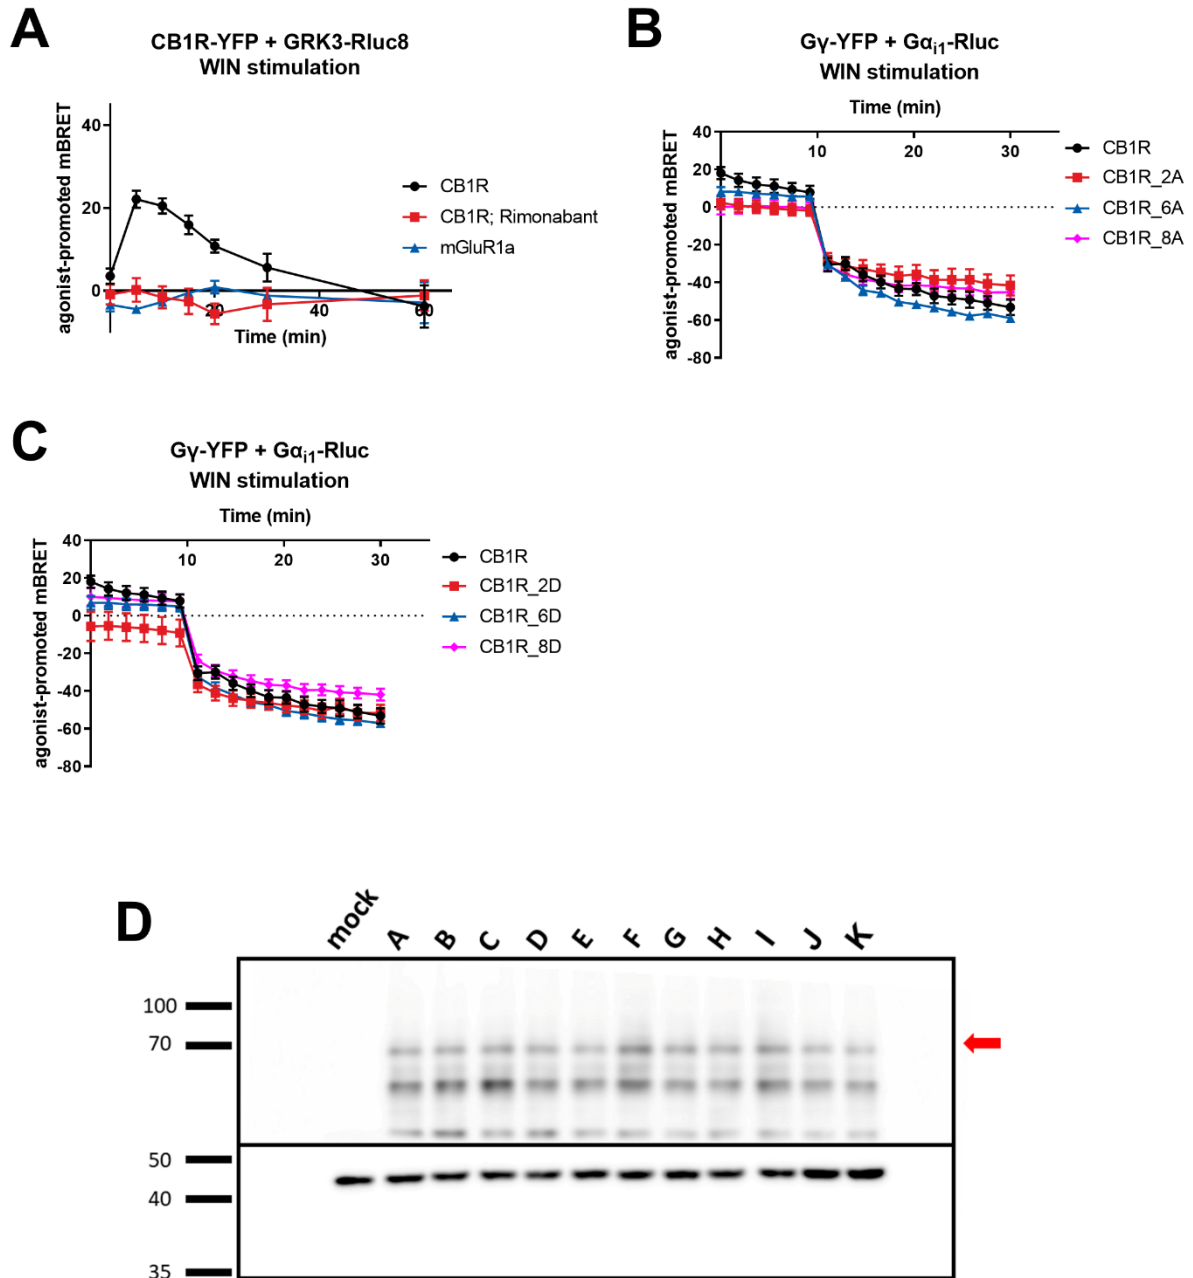

**Suppl. Fig. 2. GRK3 recruitment by WIN-activated CB1R. CB1R phosphorylation mutants retain the capability to induce rapid dissociation of G protein subunits. Mutant CB1Rs variants have similar levels of expression to wild-type CB1R. A)** Kinetic profiles of GRK3-RLuc8 recruitment by WIN-activated CB1R-YFP/mGluR1a in HEK293 cells pretreated or not with rimonabant. HEK293 cells were transiently cotransfected with the plasmid coding for CB1R-YFP or mGluR1a and GRK3-RLuc8. After sixteen hours, cells were pretreated or not for 30 minutes with rimonabant (45  $\mu$ M) prior to the stimulation with the CB1R agonist WIN (1  $\mu$ M). **B)** Alanine mutant CB1Rs preserve the ability to activate of G proteins. HEK293 cells were transiently cotransfected with CB1R-SNAP variant, G $\alpha_i$ -Rluc8, G $\beta$ -Flag, G $\gamma$ -YFP (2:1:1:1 ratio). Firstly, basal BRET was measured for 10 minutes. Afterward, cells were stimulated by 1  $\mu$ M WIN. **C)** Aspartic acid mutant CB1Rs preserve the ability to activate of G proteins. HEK293 cells were transiently cotransfected with CB1R-SNAP variant, G $\alpha_i$ -Rluc8, G $\beta$ -Flag, G $\gamma$ -YFP (2:1:1:1 ratio). Firstly, basal BRET was measured for 10 minutes. Afterward, cells were stimulated by 1  $\mu$ M WIN. **D)** Mutant CB1Rs variants have similar levels of expression to wild-type CB1R. HEK293

cells were transfected with the indicated CB1R variant or with empty plasmid pRK6 (mock). Cell lysates were separated by SDS-PAGE and subjected to Western blotting. Membranes were stained with either anti-GFP antibody for detection of CB1R-YFP variants (top blot) or anti-Actin antibody (actin) to normalize for loading and transfer of proteins (bottom blot). Legend: mock (pRK6 empty vector transfection), A) CB1R, B) CB1R\_2A, C) CB1R\_6A, D) CB1R\_8A, E) CB1R\_2D, F) CB1R\_6D, G) CB1R\_8D, H) CB1R<sup>425</sup>SMGDS<sup>429-460</sup>TMAVATDTA<sup>468</sup>, I) CB1R<sup>425</sup>AMGDA<sup>429-460</sup>TMAVATDTA<sup>468</sup>, J) CB1R<sup>425</sup>SMGDS<sup>429-460</sup>AMSVSADAS<sup>468</sup>, K) CB1R<sup>425</sup>AMGDA<sup>429-460</sup>AMSVSADAS<sup>468</sup>.

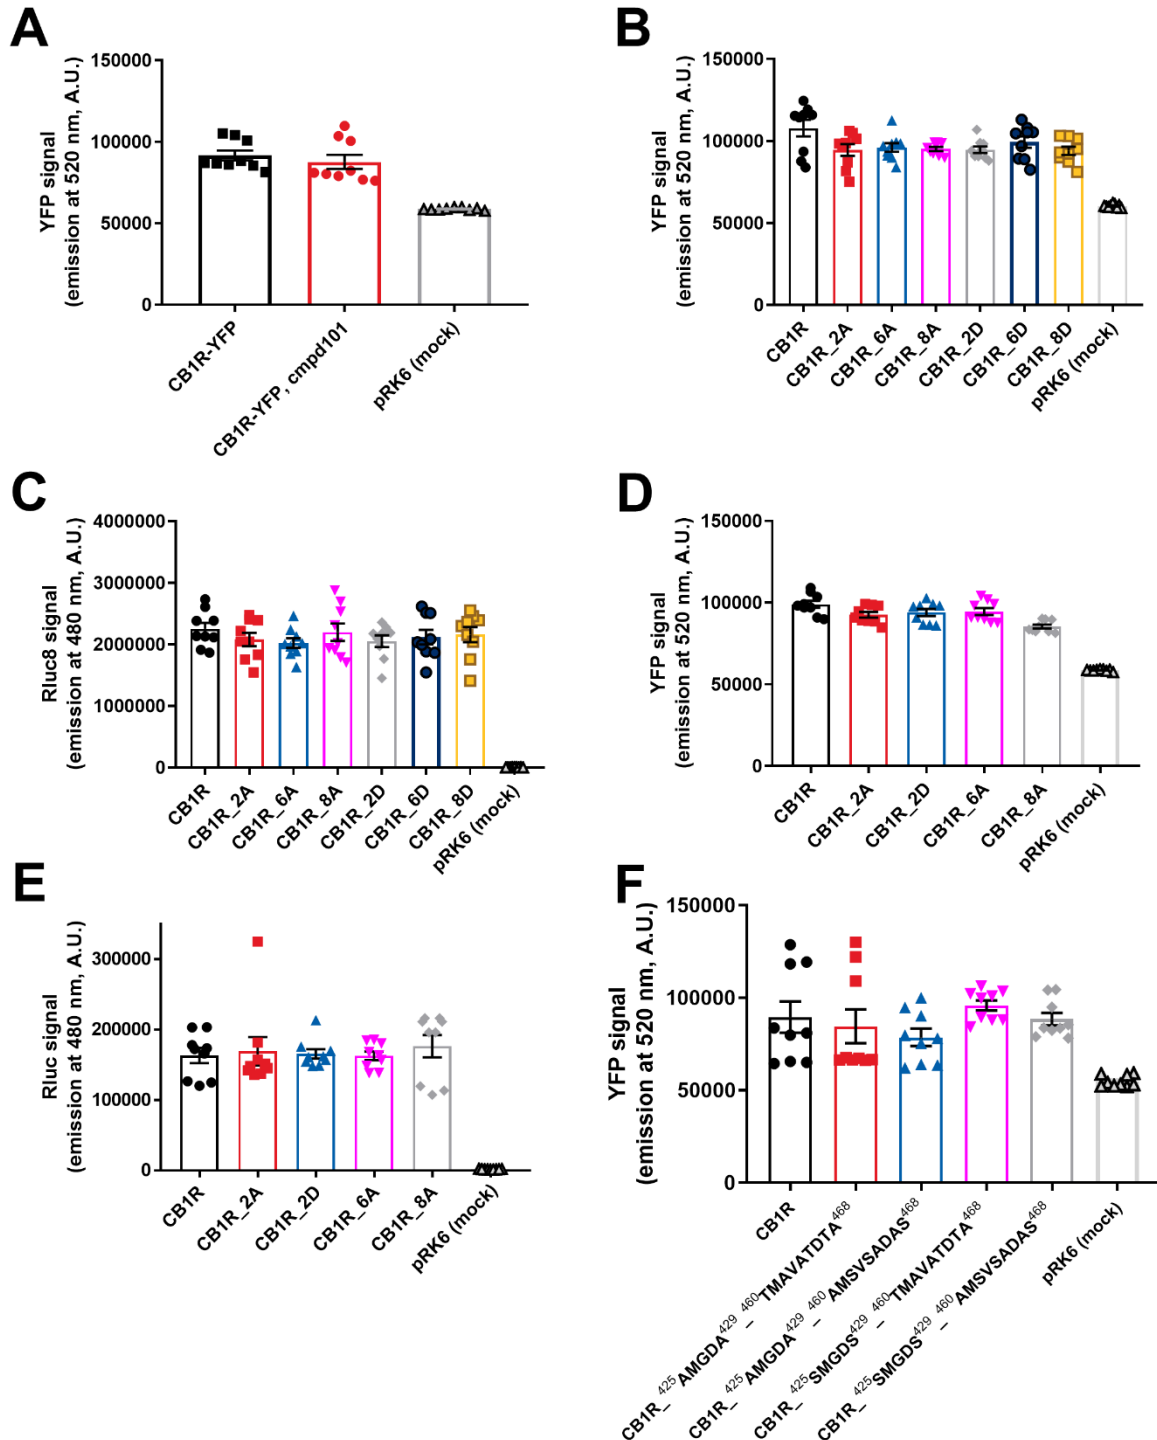

**Suppl. Fig. 3. Expression levels of CB1R-YFP variants, GRK3-Rluc8 and  $\beta$ -arrestin2-Rluc in transiently transfected HEK293 cells.** Emission of CB1R-YFP variants was measured at 520 nm on Mithras LB 940 microplate reader after excitation at 485 nm. Emission of Rluc constructs was measured at 480 nm on Mithras LB 940 microplate reader 5 minutes after adding coelenterazine h. **A)** Cmpd101 does not affect the expression of CB1R-YFP. Expression level determination of CB1R-YFP in presence/absence of compd101. **B)** Expression levels of CB1R-YFP variants. **C)** GRK3-Rluc8 in cells coexpressing mutant CB1Rs. **D)** Expression levels of CB1R-YFP variants. **E)**  $\beta$ -arrestin2-Rluc in cells coexpressing mutant CB1R. **F)** Expression level determination of CB1R-YFP variants.

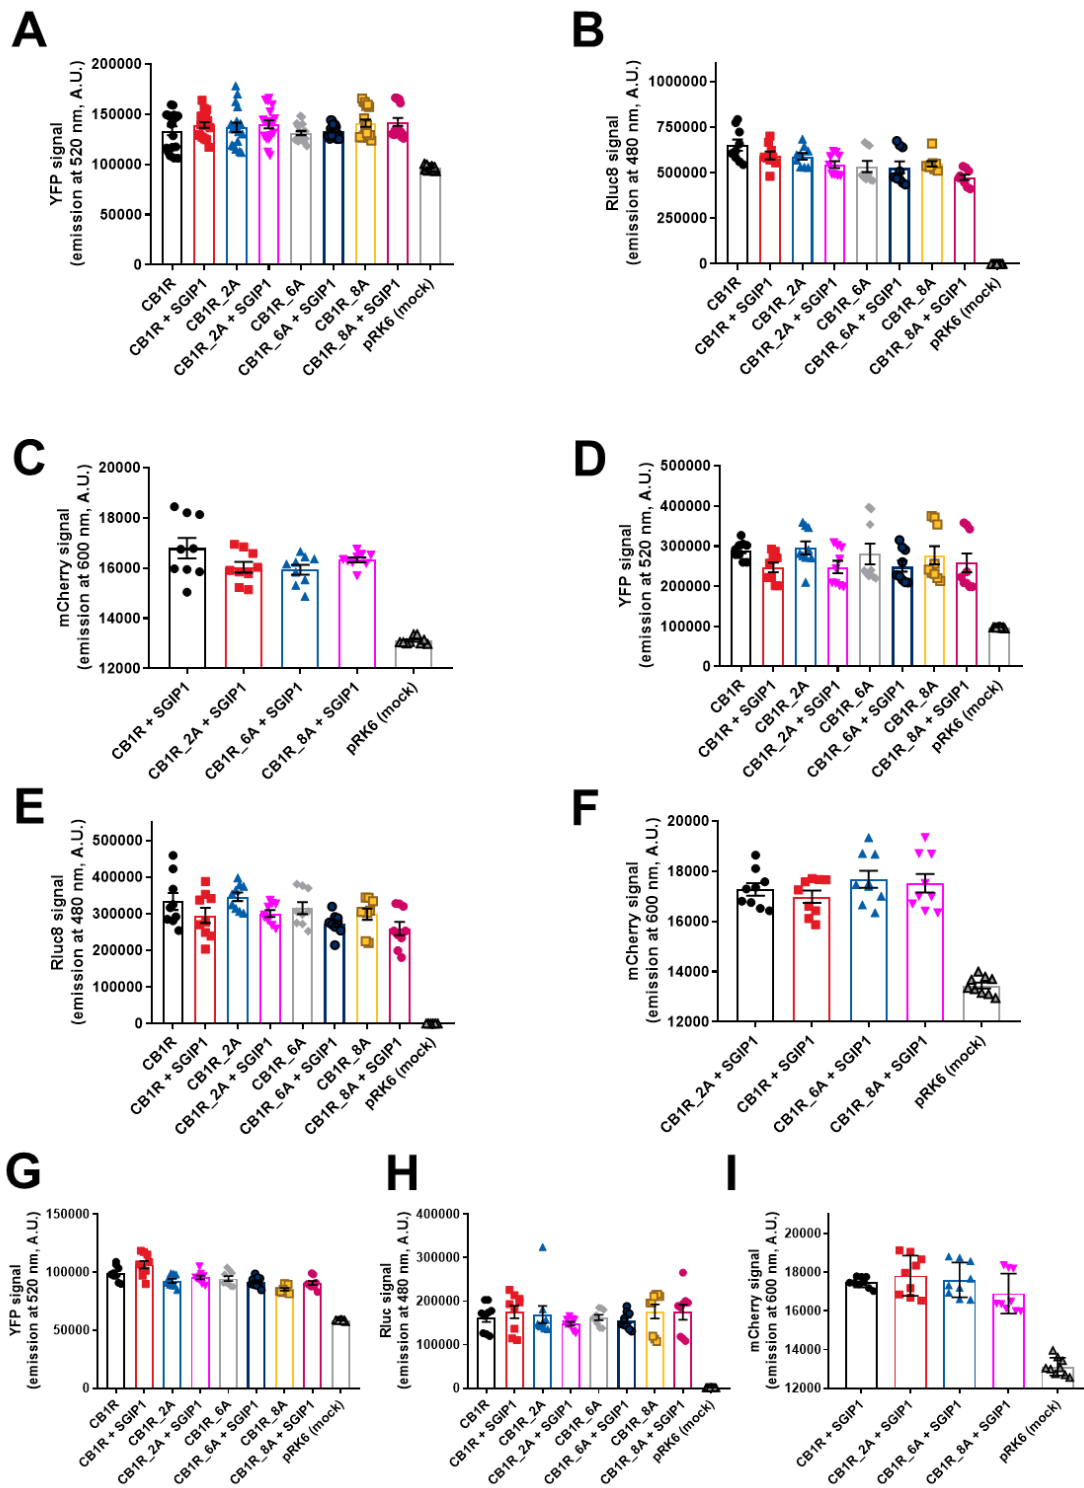

**Suppl. Fig. 4. Expression level determination of CB1R-YFP variants, GRK3-Rluc8,  $\beta$ -arrestin2-Rluc and SGIP1-mCherry in transiently transfected HEK293 cells.** Emission of YFP proteins was measured at 520 nm on Mithras LB 940 microplate reader after excitation at 485 nm. Emission of Rluc constructs was measured at 480 nm on Mithras LB 940 microplate reader 5 minutes after adding coelenterazine h. Emission of SGIP1-mCherry was measured at 600 nm on Mithras LB 940 microplate after excitation at 540 nm. **A)** Expression level determination of CB1R-YFP variants in cells coexpressing SGIP1-mCherry

and GRK3-Rluc8. **B)** GRK3-Rluc8 in cells coexpressing mutant CB1Rs. **C)** SGIP1-mCherry expression in cells coexpressing different CB1R receptors. **D)** Expression level determination of CB1R-YFP variants in cells coexpressing SGIP1-mCherry and  $\beta$ -arrestin2-Rluc. **E)**  $\beta$ -arrestin2-Rluc in cells coexpressing mutant CB1Rs. **F)** SGIP1-mCherry expression in cells coexpressing different CB1R receptors. **G)** Expression level of  $G\gamma$ -YFP cells coexpressing distinct CB1R-SNAP variant, SGIP1-mCherry and GRK3-Rluc8. **H)** GRK3-Rluc8 in cells coexpressing mutant CB1R-SNAP. **I)** SGIP1-mCherry expression in cells coexpressing different CB1R receptors.

**A**

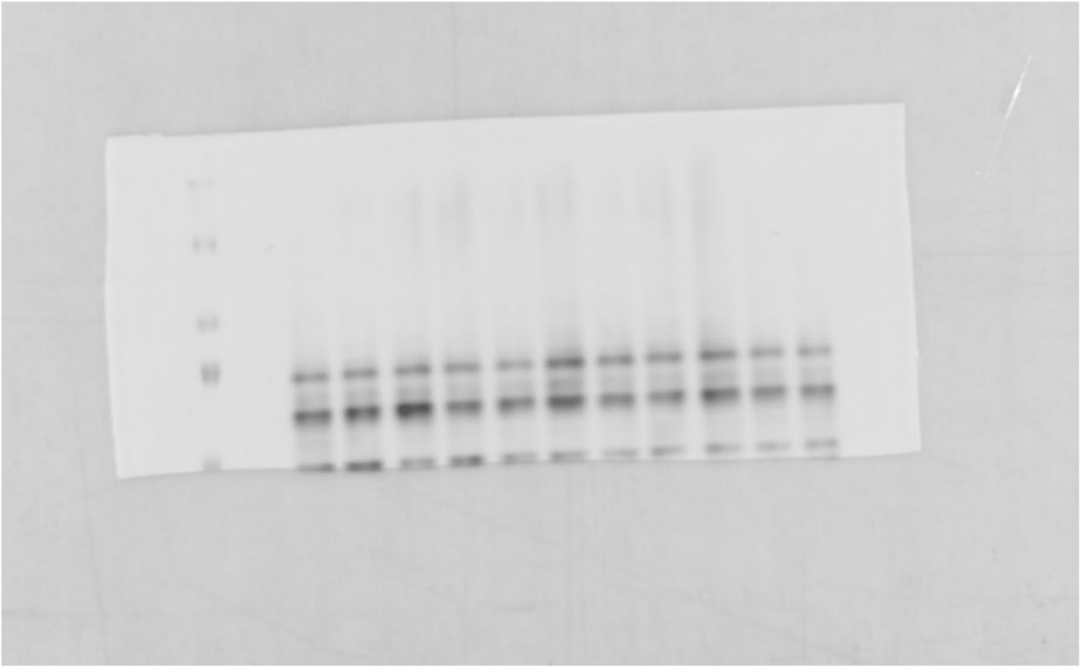

**B**

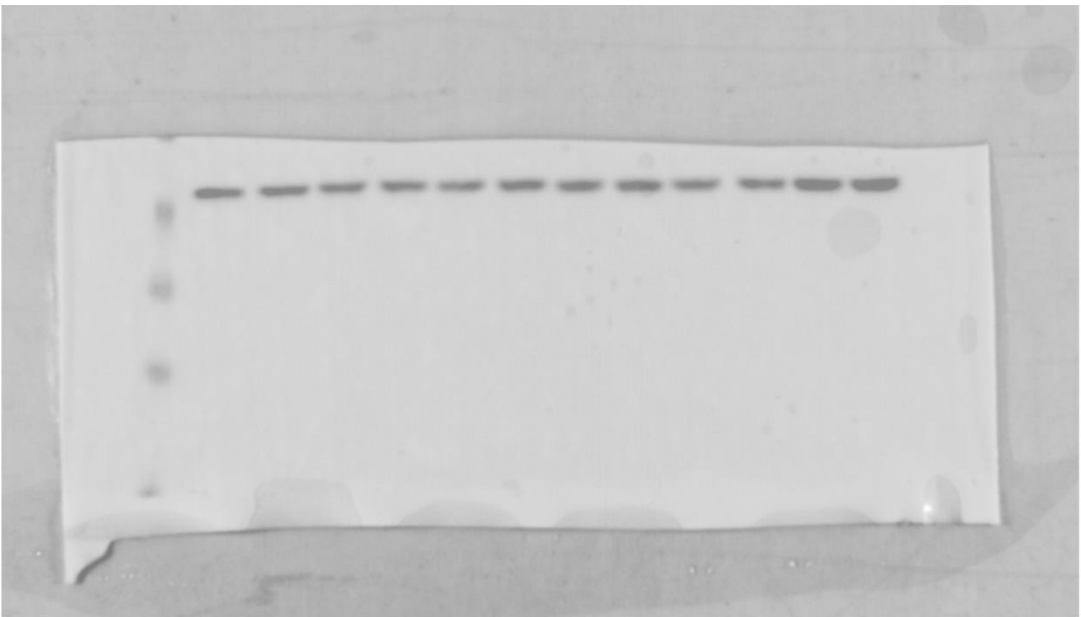

Suppl. Fig. 5. Full uncropped immunoblot image from Supp. Fig. 2D.



## A Gy-YFP + GRK3-Rluc8 +- cmpd101

| ANOVA table              | SS     | DF | MS     | F (DFn, DFd)      | P value  |
|--------------------------|--------|----|--------|-------------------|----------|
| Time x cmpd101 treatment | 30198  | 4  | 7550   | F (4, 40) = 58.33 | P<0.0001 |
| Time                     | 154175 | 4  | 38544  | F (4, 40) = 85.88 | P<0.0001 |
| cmpd101 treatment        | 145702 | 1  | 145702 | F (1, 40) = 1126  | P<0.0001 |

  

| Šidák's multiple comparisons test | Mean Diff. | 95.00% CI of diff. | Below threshold? | Summary | Adjusted P Value |
|-----------------------------------|------------|--------------------|------------------|---------|------------------|
| CB1R vs CB1R + cmpd101            |            |                    |                  |         |                  |
| 0 min                             | 9.834      | -4.627 to 24.30    | No               | ns      | 0.3197           |
| 5 min after WIN stimulation       | 103.0      | 88.50 to 117.4     | Yes              | ****    | <0.0001          |
| 15 min after WIN stimulation      | 112.0      | 97.50 to 126.4     | Yes              | ****    | <0.0001          |
| 30 min after WIN stimulation      | 95.31      | 80.85 to 109.8     | Yes              | ****    | <0.0001          |
| 60 min after WIN stimulation      | 82.29      | 67.83 to 96.75     | Yes              | ****    | <0.0001          |

## B

| ANOVA table                           | SS     | DF | MS    | F (DFn, DFd)        | P value  |
|---------------------------------------|--------|----|-------|---------------------|----------|
| WIN concentration x cmpd101 treatment | 1141   | 7  | 163.0 | F (7, 112) = 0.6954 | P=0.6758 |
| WIN concentration                     | 257479 | 7  | 36783 | F (7, 112) = 156.9  | P<0.0001 |
| cmpd101 treatment                     | 373.6  | 1  | 373.6 | F (1, 16) = 1.178   | P=0.2938 |

## C

### CB1R-YFP + GRK3-Rluc8 +- cmpd101

| ANOVA table              | SS   | DF | MS    | F (DFn, DFd)             | P value  |
|--------------------------|------|----|-------|--------------------------|----------|
| Time x cmpd101 treatment | 1213 | 5  | 242.5 | F (5, 80) = 19.57        | P<0.0001 |
| Time                     | 5161 | 5  | 1032  | F (2.043, 32.69) = 83.29 | P<0.0001 |
| cmpd101 treatment        | 2480 | 1  | 2480  | F (1, 16) = 23.54        | P=0.0002 |

  

| Šidák's multiple comparisons test | Mean Diff. | 95.00% CI of diff. | Below threshold? | Summary | Adjusted P Value |
|-----------------------------------|------------|--------------------|------------------|---------|------------------|
| CB1R vs CB1R + cmpd101            |            |                    |                  |         |                  |
| 0 min                             | 0.5299     | -6.814 to 7.874    | No               | ns      | >0.9999          |
| 5 min after WIN stimulation       | 18.58      | 11.56 to 25.59     | Yes              | ****    | <0.0001          |
| 10 min after WIN stimulation      | 16.43      | 8.811 to 24.04     | Yes              | ****    | <0.0001          |
| 15 min after WIN stimulation      | 12.65      | 6.149 to 19.16     | Yes              | ***     | 0.0002           |
| 30 min after WIN stimulation      | 3.689      | -3.301 to 10.68    | No               | ns      | 0.5737           |
| 60 min after WIN stimulation      | 5.629      | -3.573 to 14.83    | No               | ns      | 0.4104           |

## D

### CB1R-YFP + $\beta$ -arrestin2-Rluc +- cmpd101

| ANOVA table              | SS   | DF | MS    | F (DFn, DFd)      | P value  |
|--------------------------|------|----|-------|-------------------|----------|
| Time x cmpd101 treatment | 3681 | 5  | 736.1 | F (5, 80) = 16.98 | P<0.0001 |
| Time                     | 3436 | 5  | 687.2 | F (5, 80) = 15.85 | P<0.0001 |
| cmpd101 treatment        | 4368 | 1  | 4368  | F (1, 16) = 35.04 | P<0.0001 |

  

| Šidák's multiple comparisons test | Mean Diff. | 95.00% CI of diff. | Below threshold? | Summary | Adjusted P Value |
|-----------------------------------|------------|--------------------|------------------|---------|------------------|
| CB1R vs CB1R + cmpd101            |            |                    |                  |         |                  |
| 0 min                             | -1.184     | -7.590 to 5.223    | No               | ns      | 0.9946           |
| 5 min after WIN stimulation       | 28.70      | 16.21 to 41.20     | Yes              | ****    | <0.0001          |
| 10 min after WIN stimulation      | 24.25      | 11.42 to 37.07     | Yes              | ***     | 0.0003           |
| 15 min after WIN stimulation      | 18.10      | 5.596 to 30.61     | Yes              | **      | 0.0031           |
| 30 min after WIN stimulation      | 6.890      | -2.177 to 15.96    | No               | ns      | 0.2007           |
| 60 min after WIN stimulation      | -0.4430    | -11.34 to 10.46    | No               | ns      | >0.9999          |

**Suppl. table 1. Statistical analysis of kinetics of presented protein-protein interactions.** Curves were compared by two-way ANOVA followed by Sidak's multiple comparison test. If the curves were significantly different, post hoc analysis of time points was performed.

**Gy-YFP + GRK3-Rluc8 – CB1R, CB1R\_2A, CB1R\_6A, CB1R\_8A**

| ANOVA table         | SS     | DF | MS    | F (DFn, DFd)             | P value  |
|---------------------|--------|----|-------|--------------------------|----------|
| Time x CB1R variant | 35899  | 12 | 2992  | F (12, 128) = 7.938      | P<0.0001 |
| Time                | 319548 | 4  | 79887 | F (1.627, 52.06) = 212.0 | P<0.0001 |
| CB1R variant        | 113790 | 3  | 37930 | F (3, 32) = 13.53        | P<0.0001 |

| Sidak's multiple comparisons test   | Mean Diff. | 95.00% CI of diff. | Below threshold? | Summary | Adjusted P Value |
|-------------------------------------|------------|--------------------|------------------|---------|------------------|
| <b>0 min</b>                        |            |                    |                  |         |                  |
| CB1R vs. CB1R 2A                    | -12.77     | -65.76 to 40.23    | No               | ns      | 0.9993           |
| CB1R vs. CB1R 6A                    | 7.168      | -47.44 to 61.78    | No               | ns      | >0.9999          |
| CB1R vs. CB1R 8A                    | -16.29     | -69.39 to 36.81    | No               | ns      | 0.9925           |
| <b>5 min after WIN stimulation</b>  |            |                    |                  |         |                  |
| CB1R vs. CB1R 2A                    | -18.82     | -74.00 to 36.36    | No               | ns      | 0.9878           |
| CB1R vs. CB1R 6A                    | 29.46      | -31.48 to 90.40    | No               | ns      | 0.8438           |
| CB1R vs. CB1R 8A                    | 59.70      | 3.323 to 116.1     | Yes              | *       | 0.0330           |
| <b>15 min after WIN stimulation</b> |            |                    |                  |         |                  |
| CB1R vs. CB1R 2A                    | -33.03     | -85.00 to 18.95    | No               | ns      | 0.4629           |
| CB1R vs. CB1R 6A                    | 36.71      | -22.02 to 95.44    | No               | ns      | 0.5177           |
| CB1R vs. CB1R 8A                    | 64.44      | 10.25 to 118.6     | Yes              | *       | 0.0135           |
| <b>30 min after WIN stimulation</b> |            |                    |                  |         |                  |
| CB1R vs. CB1R 2A                    | -50.33     | -93.09 to -7.561   | Yes              | *       | 0.0145           |
| CB1R vs. CB1R 6A                    | 21.47      | -24.16 to 67.09    | No               | ns      | 0.8665           |
| CB1R vs. CB1R 8A                    | 43.76      | 1.341 to 86.17     | Yes              | *       | 0.0401           |
| <b>60 min after WIN stimulation</b> |            |                    |                  |         |                  |
| CB1R vs. CB1R 2A                    | -32.50     | -85.49 to 20.48    | No               | ns      | 0.4907           |
| CB1R vs. CB1R 6A                    | 18.94      | -39.45 to 77.32    | No               | ns      | 0.9927           |
| CB1R vs. CB1R 8A                    | 33.50      | -21.05 to 88.05    | No               | ns      | 0.5199           |

**Suppl. table 2. Statistical analysis of kinetics of presented protein-protein interactions.** *Curves were compared by two-way ANOVA followed by Sidak's multiple comparison test. If the curves were significantly different, post hoc analysis of time points was performed.*

## A Gy-YFP + GRK3-Rluc8 – CB1R +- SGIP1

| ANOVA table     | SS     | DF | MS     | F (DFn, DFd)             | P value  |
|-----------------|--------|----|--------|--------------------------|----------|
| Time x +- SGIP1 | 37097  | 5  | 7419   | F (5, 80) = 13.81        | P<0.0001 |
| Time            | 533999 | 5  | 106800 | F (1.427, 22.83) = 198.8 | P<0.0001 |
| +/- SGIP1       | 21381  | 1  | 21381  | F (1, 16) = 2.940        | P=0.1057 |

| Šidák's multiple comparisons test | Mean Diff. | 95.00% CI of diff. | Below threshold? | Summary | Adjusted P Value |
|-----------------------------------|------------|--------------------|------------------|---------|------------------|
| CB1R vs CB1R + SGIP1              |            |                    |                  |         |                  |
| 0 min                             | 15.55      | -40.96 to 72.05    | No               | ns      | 0.9625           |
| 5 min after WIN stimulation       | -34.67     | -98.43 to 29.08    | No               | ns      | 0.5364           |
| 15 min after WIN stimulation      | -43.23     | -108.7 to 22.22    | No               | ns      | 0.3258           |
| 30 min after WIN stimulation      | -52.62     | -104.4 to -0.8715  | Yes              | *       | 0.0452           |
| 60 min after WIN stimulation      | -79.20     | -130.1 to -28.31   | Yes              | **      | 0.0016           |

## B Gy-YFP + GRK3-Rluc8 – CB1R\_2A +- SGIP1

| ANOVA table     | SS     | DF | MS     | F (DFn, DFd)             | P value  |
|-----------------|--------|----|--------|--------------------------|----------|
| Time x +- SGIP1 | 37906  | 5  | 7581   | F (5, 80) = 30.30        | P<0.0001 |
| Time            | 632583 | 5  | 126517 | F (2.341, 37.46) = 505.7 | P<0.0001 |
| +/- SGIP1       | 6581   | 1  | 6581   | F (1, 16) = 4.507        | P=0.0497 |

| Šidák's multiple comparisons test | Mean Diff. | 95.00% CI of diff. | Below threshold? | Summary | Adjusted P Value |
|-----------------------------------|------------|--------------------|------------------|---------|------------------|
| CB1R_2A vs CB1R_2A + SGIP1        |            |                    |                  |         |                  |
| 0 min                             | 20.60      | -1.657 to 42.85    | No               | ns      | 0.0785           |
| 5 min after WIN stimulation       | -14.09     | -49.76 to 21.58    | No               | ns      | 0.8176           |
| 15 min after WIN stimulation      | -17.28     | -45.26 to 10.69    | No               | ns      | 0.4000           |
| 30 min after WIN stimulation      | -29.85     | -63.24 to 3.547    | No               | ns      | 0.0946           |
| 60 min after WIN stimulation      | -84.26     | -122.6 to -45.93   | Yes              | ****    | <0.0001          |

## C Gy-YFP + GRK3-Rluc8 – CB1R\_6A +- SGIP1

| ANOVA table     | SS     | DF | MS    | F (DFn, DFd)             | P value  |
|-----------------|--------|----|-------|--------------------------|----------|
| Time x +- SGIP1 | 32253  | 5  | 6451  | F (5, 80) = 21.12        | P<0.0001 |
| Time            | 387015 | 5  | 77403 | F (1.798, 28.77) = 253.5 | P<0.0001 |
| +/- SGIP1       | 72338  | 1  | 72338 | F (1, 16) = 20.37        | P=0.0004 |

| Šidák's multiple comparisons test | Mean Diff. | 95.00% CI of diff. | Below threshold? | Summary | Adjusted P Value |
|-----------------------------------|------------|--------------------|------------------|---------|------------------|
| CB1R_6A vs CB1R_6A + SGIP1        |            |                    |                  |         |                  |
| 0 min                             | -8.203     | -36.64 to 20.24    | No               | ns      | 0.9439           |
| 5 min after WIN stimulation       | -63.58     | -112.6 to -14.60   | Yes              | **      | 0.0079           |
| 15 min after WIN stimulation      | -71.15     | -117.3 to -25.02   | Yes              | **      | 0.0017           |
| 30 min after WIN stimulation      | -71.14     | -115.6 to -26.69   | Yes              | **      | 0.0013           |
| 60 min after WIN stimulation      | -94.90     | -144.0 to -45.85   | Yes              | ***     | 0.0002           |

## D Gy-YFP + GRK3-Rluc8 – CB1R\_8A +- SGIP1

| ANOVA table     | SS     | DF | MS    | F (DFn, DFd)             | P value  |
|-----------------|--------|----|-------|--------------------------|----------|
| Time x +- SGIP1 | 13219  | 5  | 2644  | F (5, 80) = 10.65        | P<0.0001 |
| Time            | 124357 | 5  | 24871 | F (2.275, 36.40) = 100.2 | P<0.0001 |
| +/- SGIP1       | 8.017  | 1  | 8.017 | F (1, 16) = 0.004352     | P=0.9482 |

**Suppl. table 3. Statistical analysis of kinetics of presented protein-protein interactions. Curves were compared by two-way ANOVA followed by Sidak's multiple comparison test. If the curves were significantly different, post hoc analysis of time points was performed.**

### CB1R-YFP + GRK3-Rluc8 – CB1R, CB1R\_2A, CB1R\_6A, CB1R\_8A

| ANOVA table         | SS    | DF | MS    | F (DFn, DFd)             | P value  |
|---------------------|-------|----|-------|--------------------------|----------|
| Time x CB1R variant | 19456 | 15 | 1297  | F (15, 160) = 17.41      | P<0.0001 |
| Time                | 27135 | 5  | 5427  | F (3.012, 96.40) = 72.84 | P<0.0001 |
| CB1R variant        | 58182 | 3  | 19394 | F (3, 32) = 46.48        | P<0.0001 |

  

| Sidak's multiple comparisons test   | Mean Diff. | 95.00% CI of diff. | Below threshold? | Summary | Adjusted P Value |
|-------------------------------------|------------|--------------------|------------------|---------|------------------|
| <b>0 min</b>                        |            |                    |                  |         |                  |
| CB1R vs. CB1R 2A                    | -6.820     | -13.87 to 0.2316   | No               | ns      | 0.0588           |
| CB1R vs. CB1R 6A                    | 0.1555     | -6.227 to 6.538    | No               | ns      | 0.9999           |
| CB1R vs. CB1R 8A                    | 0.7040     | -10.93 to 12.34    | No               | ns      | 0.9975           |
| <b>5 min after WIN stimulation</b>  |            |                    |                  |         |                  |
| CB1R vs. CB1R 2A                    | -38.91     | -54.16 to -23.66   | Yes              | ****    | <0.0001          |
| CB1R vs. CB1R 6A                    | 13.73      | 2.633 to 24.83     | Yes              | *       | 0.0148           |
| CB1R vs. CB1R 8A                    | 18.17      | 6.791 to 29.56     | Yes              | **      | 0.0022           |
| <b>10 min after WIN stimulation</b> |            |                    |                  |         |                  |
| CB1R vs. CB1R 2A                    | -40.99     | -60.87 to -21.12   | Yes              | ***     | 0.0003           |
| CB1R vs. CB1R 6A                    | 15.66      | 4.394 to 26.93     | Yes              | **      | 0.0068           |
| CB1R vs. CB1R 8A                    | 21.06      | 9.619 to 32.50     | Yes              | ***     | 0.0007           |
| <b>15 min after WIN stimulation</b> |            |                    |                  |         |                  |
| CB1R vs. CB1R 2A                    | -51.33     | -71.93 to -30.72   | Yes              | ****    | <0.0001          |
| CB1R vs. CB1R 6A                    | 12.71      | 1.939 to 23.48     | Yes              | *       | 0.0187           |
| CB1R vs. CB1R 8A                    | 12.62      | 0.5938 to 24.64    | Yes              | *       | 0.0384           |
| <b>30 min after WIN stimulation</b> |            |                    |                  |         |                  |
| CB1R vs. CB1R 2A                    | -40.31     | -55.68 to -24.95   | Yes              | ****    | <0.0001          |
| CB1R vs. CB1R 6A                    | 1.751      | -8.621 to 12.12    | No               | ns      | 0.9576           |
| CB1R vs. CB1R 8A                    | -1.273     | -14.38 to 11.83    | No               | ns      | 0.9919           |
| <b>60 min after WIN stimulation</b> |            |                    |                  |         |                  |
| CB1R vs. CB1R 2A                    | -18.20     | -40.74 to 4.351    | No               | ns      | 0.1280           |
| CB1R vs. CB1R 6A                    | -4.015     | -16.58 to 8.551    | No               | ns      | 0.7916           |
| CB1R vs. CB1R 8A                    | -8.775     | -25.21 to 7.664    | No               | ns      | 0.4283           |

**Suppl. table 4. Statistical analysis of kinetics of presented protein-protein interactions.** Curves were compared by two-way ANOVA followed by Sidak's multiple comparison test. If the curves were significantly different, post hoc analysis of time points was performed.

## A CB1R-YFP + GRK3-Rluc8 +- SGIP1

| ANOVA table     | SS    | DF | MS    | F (DFn, DFd)             | P value  |
|-----------------|-------|----|-------|--------------------------|----------|
| Time x +- SGIP1 | 2379  | 5  | 475.8 | F (5, 80) = 7.613        | P<0.0001 |
| Time            | 28003 | 5  | 5601  | F (2.339, 37.42) = 89.61 | P<0.0001 |
| + - SGIP1       | 5295  | 1  | 5295  | F (1, 16) = 28.23        | P<0.0001 |

| Sidak's multiple comparisons test | Mean Diff. | 95.00% CI of diff. | Below threshold? | Summary | Adjusted P Value |
|-----------------------------------|------------|--------------------|------------------|---------|------------------|
| CB1R vs CB1R + SGIP1              |            |                    |                  |         |                  |
| 0 min                             | 3.686      | -3.527 to 10.90    | No               | ns      | 0.5737           |
| 5 min after WIN stimulation       | -16.55     | -29.22 to -3.871   | Yes              | **      | 0.0085           |
| 10 min after WIN stimulation      | -19.44     | -32.26 to -6.621   | Yes              | **      | 0.0026           |
| 15 min after WIN stimulation      | -24.81     | -38.13 to -11.50   | Yes              | ***     | 0.0003           |
| 30 min after WIN stimulation      | -19.03     | -32.69 to -5.373   | Yes              | **      | 0.0043           |
| 60 min after WIN stimulation      | -7.876     | -25.03 to 9.275    | No               | ns      | 0.7054           |

## B CB1R\_2A-YFP + GRK3-Rluc8 +- SGIP1

| ANOVA table     | SS    | DF | MS    | F (DFn, DFd)             | P value  |
|-----------------|-------|----|-------|--------------------------|----------|
| Time x +- SGIP1 | 4649  | 5  | 929.8 | F (5, 80) = 6.885        | P<0.0001 |
| Time            | 78239 | 5  | 15648 | F (2.298, 36.77) = 115.9 | P<0.0001 |
| + - SGIP1       | 8754  | 1  | 8754  | F (1, 16) = 12.67        | P=0.0026 |

| Sidak's multiple comparisons test | Mean Diff. | 95.00% CI of diff. | Below threshold? | Summary | Adjusted P Value |
|-----------------------------------|------------|--------------------|------------------|---------|------------------|
| CB1R_2A vs CB1R_2A + SGIP1        |            |                    |                  |         |                  |
| 0 min                             | 2.844      | -7.480 to 13.17    | No               | ns      | >0.9999          |
| 5 min after WIN stimulation       | -4.964     | -22.11 to 12.19    | No               | ns      | >0.9999          |
| 10 min after WIN stimulation      | -23.70     | -46.61 to -0.7937  | Yes              | *       | 0.0406           |
| 15 min after WIN stimulation      | -19.70     | -44.26 to 4.860    | No               | ns      | 0.1634           |
| 30 min after WIN stimulation      | -35.82     | -54.95 to -16.69   | Yes              | ***     | 0.0002           |
| 60 min after WIN stimulation      | -26.70     | -56.97 to 3.577    | No               | ns      | 0.1042           |

## C CB1R\_6A-YFP + GRK3-Rluc8 +- SGIP1

| ANOVA table     | SS    | DF | MS    | F (DFn, DFd)             | P value  |
|-----------------|-------|----|-------|--------------------------|----------|
| Time x +- SGIP1 | 752.9 | 5  | 150.6 | F (5, 80) = 2.776        | P=0.0231 |
| Time            | 3873  | 5  | 774.6 | F (2.474, 39.58) = 14.28 | P<0.0001 |
| + - SGIP1       | 122.9 | 1  | 122.9 | F (1, 16) = 1.095        | P=0.3108 |

## D CB1R\_8A-YFP + GRK3-Rluc8 +- SGIP1

| ANOVA table     | SS    | DF | MS    | F (DFn, DFd)             | P value  |
|-----------------|-------|----|-------|--------------------------|----------|
| Time x +- SGIP1 | 371.8 | 5  | 74.36 | F (5, 80) = 1.187        | P=0.3231 |
| Time            | 1134  | 5  | 226.8 | F (3.327, 53.23) = 3.619 | P=0.0157 |
| + - SGIP1       | 1.071 | 1  | 1.071 | F (1, 16) = 0.005455     | P=0.9420 |

Suppl. table 5. Statistical analysis of kinetics of presented protein-protein interactions. Curves were compared by two-way ANOVA followed by Sidak's multiple comparison test. If the curves were significantly different, post hoc analysis of time points was performed.

### CB1R-YFP + $\beta$ -arrestin2-Rluc – CB1R, CB1R\_2A, CB1R\_6A, CB1R\_8A

| ANOVA table         | SS   | DF | MS    | F (DFn, DFd)             | P value  |
|---------------------|------|----|-------|--------------------------|----------|
| Time x CB1R variant | 4037 | 15 | 269.1 | F (15, 160) = 2.709      | P=0.0010 |
| Time                | 6623 | 5  | 1325  | F (3.664, 117.3) = 13.33 | P<0.0001 |
| CB1R variant        | 6412 | 3  | 2137  | F (3, 32) = 20.31        | P<0.0001 |

  

| Sidak's multiple comparisons test | Mean Diff. | 95.00% CI of diff. | Below threshold? | Summary | Adjusted P Value |
|-----------------------------------|------------|--------------------|------------------|---------|------------------|
| <b>0 min</b>                      |            |                    |                  |         |                  |
| CB1R vs. CB1R 2A                  | 3.975      | -3.738 to 11.69    | No               | ns      | 0.4657           |
| CB1R vs. CB1R 6A                  | 2.515      | -5.670 to 10.70    | No               | ns      | 0.8090           |
| CB1R vs. CB1R 8A                  | 4.040      | -2.256 to 10.34    | No               | ns      | 0.2753           |
| <b>5 min</b>                      |            |                    |                  |         |                  |
| CB1R vs. CB1R 2A                  | 13.41      | 3.295 to 23.52     | Yes              | **      | 0.0099           |
| CB1R vs. CB1R 6A                  | 25.44      | 16.73 to 34.15     | Yes              | ****    | <0.0001          |
| CB1R vs. CB1R 8A                  | 24.66      | 17.33 to 31.99     | Yes              | ****    | <0.0001          |
| <b>10 min</b>                     |            |                    |                  |         |                  |
| CB1R vs. CB1R 2A                  | 16.76      | 3.889 to 29.63     | Yes              | **      | 0.0095           |
| CB1R vs. CB1R 6A                  | 26.08      | 15.65 to 36.50     | Yes              | ****    | <0.0001          |
| CB1R vs. CB1R 8A                  | 25.48      | 13.11 to 37.85     | Yes              | ***     | 0.0001           |
| <b>15 min</b>                     |            |                    |                  |         |                  |
| CB1R vs. CB1R 2A                  | 7.380      | -8.523 to 23.28    | No               | ns      | 0.5235           |
| CB1R vs. CB1R 6A                  | 15.89      | 6.848 to 24.93     | Yes              | ***     | 0.0008           |
| CB1R vs. CB1R 8A                  | 18.19      | 5.630 to 30.76     | Yes              | **      | 0.0049           |
| <b>30 min</b>                     |            |                    |                  |         |                  |
| CB1R vs. CB1R 2A                  | 4.511      | -15.05 to 24.07    | No               | ns      | 0.9066           |
| CB1R vs. CB1R 6A                  | 6.602      | -10.88 to 24.08    | No               | ns      | 0.6796           |
| CB1R vs. CB1R 8A                  | 10.87      | -6.153 to 27.89    | No               | ns      | 0.2651           |
| <b>60 min</b>                     |            |                    |                  |         |                  |
| CB1R vs. CB1R 2A                  | 0.7437     | -16.29 to 17.78    | No               | ns      | 0.9992           |
| CB1R vs. CB1R 6A                  | 2.150      | -15.91 to 20.21    | No               | ns      | 0.9849           |
| CB1R vs. CB1R 8A                  | -2.384     | -20.23 to 15.46    | No               | ns      | 0.9788           |

**Suppl. table 6. Statistical analysis of kinetics of presented protein-protein interactions.** Curves were compared by two-way ANOVA followed by Sidak's multiple comparison test. If the curves were significantly different, post hoc analysis of time points was performed.

## A CB1R-YFP + $\beta$ -arrestin2-Rluc +- SGIP1

| ANOVA table     | SS    | DF | MS    | F (DFn, DFd)             | P value  |
|-----------------|-------|----|-------|--------------------------|----------|
| Time x +- SGIP1 | 4799  | 5  | 959.8 | F (5, 95) = 7.702        | P<0.0001 |
| Time            | 32246 | 5  | 6449  | F (2.222, 42.23) = 51.76 | P<0.0001 |
| + - SGIP1       | 14155 | 1  | 14155 | F (1, 19) = 90.51        | P<0.0001 |

| Šidák's multiple comparisons test | Mean Diff. | 95.00% CI of diff. | Below threshold? | Summary | Adjusted P Value |
|-----------------------------------|------------|--------------------|------------------|---------|------------------|
| CB1R vs CB1R + SGIP1              |            |                    |                  |         |                  |
| 0 min                             | 3.561      | -3.424 to 10.55    | No               | ns      | 0.5754           |
| 5 min after WIN stimulation       | -20.24     | -26.60 to -13.89   | Yes              | ****    | <0.0001          |
| 10 min after WIN stimulation      | -33.77     | -46.43 to -21.10   | Yes              | ****    | <0.0001          |
| 15 min after WIN stimulation      | -29.90     | -39.31 to -20.48   | Yes              | ****    | <0.0001          |
| 30 min after WIN stimulation      | -29.97     | -50.39 to -9.538   | Yes              | **      | 0.0030           |
| 60 min after WIN stimulation      | -18.19     | -42.16 to 5.768    | No               | ns      | 0.2082           |

## B CB1R\_2A-YFP + $\beta$ -arrestin2-Rluc +- SGIP1

| ANOVA table     | SS    | DF | MS    | F (DFn, DFd)             | P value  |
|-----------------|-------|----|-------|--------------------------|----------|
| Time x +- SGIP1 | 1502  | 5  | 300.4 | F (5, 80) = 2.566        | P=0.0332 |
| Time            | 10293 | 5  | 2059  | F (3.343, 53.49) = 17.58 | P<0.0001 |
| + - SGIP1       | 1533  | 1  | 1533  | F (1, 16) = 7.890        | P=0.0126 |

| Šidák's multiple comparisons test | Mean Diff. | 95.00% CI of diff. | Below threshold? | Summary | Adjusted P Value |
|-----------------------------------|------------|--------------------|------------------|---------|------------------|
| CB1R vs CB1R + SGIP1              |            |                    |                  |         |                  |
| 0 min                             | -3.811     | -12.49 to 4.866    | No               | ns      | 0.7501           |
| 5 min after WIN stimulation       | -5.929     | -18.19 to 6.332    | No               | ns      | 0.6554           |
| 10 min after WIN stimulation      | -17.69     | -30.32 to -5.060   | Yes              | **      | 0.0055           |
| 15 min after WIN stimulation      | -14.55     | -33.18 to 4.071    | No               | ns      | 0.1720           |
| 30 min after WIN stimulation      | -8.504     | -30.32 to 13.31    | No               | ns      | 0.8336           |
| 60 min after WIN stimulation      | 5.272      | -15.68 to 26.22    | No               | ns      | 0.9702           |

## C CB1R\_6A-YFP + $\beta$ -arrestin2-Rluc +- SGIP1

| ANOVA table     | SS    | DF | MS    | F (DFn, DFd)      | P value  |
|-----------------|-------|----|-------|-------------------|----------|
| Time x +- SGIP1 | 1502  | 5  | 300.4 | F (5, 80) = 2.566 | P=0.0332 |
| Time            | 10293 | 5  | 2059  | F (5, 80) = 17.58 | P<0.0001 |
| + - SGIP1       | 1533  | 1  | 1533  | F (1, 16) = 7.890 | P=0.0126 |

| Šidák's multiple comparisons test | Mean Diff. | 95.00% CI of diff. | Below threshold? | Summary | Adjusted P Value |
|-----------------------------------|------------|--------------------|------------------|---------|------------------|
| CB1R vs CB1R + SGIP1              |            |                    |                  |         |                  |
| 0 min                             | 8.039      | -0.6709 to 16.75   | No               | ns      | 0.0790           |
| 5 min after WIN stimulation       | -1.879     | -15.85 to 12.10    | No               | ns      | 0.9991           |
| 10 min after WIN stimulation      | 0.4922     | -11.38 to 12.36    | No               | ns      | >0.9999          |
| 15 min after WIN stimulation      | 3.491      | -9.635 to 16.62    | No               | ns      | 0.9662           |
| 30 min after WIN stimulation      | 1.389      | -8.755 to 11.53    | No               | ns      | 0.9988           |
| 60 min after WIN stimulation      | 10.08      | -8.389 to 28.55    | No               | ns      | 0.5371           |

## D CB1R\_8A-YFP + $\beta$ -arrestin2-Rluc +- SGIP1

| ANOVA table     | SS    | DF | MS    | F (DFn, DFd)             | P value  |
|-----------------|-------|----|-------|--------------------------|----------|
| Time x +- SGIP1 | 161.3 | 5  | 32.27 | F (5, 80) = 0.3685       | P=0.8687 |
| Time            | 478.0 | 5  | 95.61 | F (3.074, 49.18) = 1.092 | P=0.3622 |
| + - SGIP1       | 170.2 | 1  | 170.2 | F (1, 16) = 1.030        | P=0.3253 |

**Suppl. table 7. Statistical analysis of kinetics of presented protein-protein interactions. Curves were compared by two-way ANOVA followed by Sidak's multiple comparison test. If the curves were significantly different, post hoc analysis of time points was performed.**

**A**

**Gy-YFP + GRK3-Rluc8 – CB1R, CB1R\_2D, CB1R\_6D, CB1R\_8D**

| ANOVA table         | SS     | DF | MS    | F (DFn, DFd)             | P value  |
|---------------------|--------|----|-------|--------------------------|----------|
| Time x CB1R variant | 12075  | 12 | 1006  | F (12, 128) = 4,095      | P<0,0001 |
| Time                | 385956 | 4  | 96489 | F (1,372, 43,90) = 392,7 | P<0,0001 |
| CB1R variant        | 24512  | 3  | 8171  | F (3, 32) = 5,273        | P=0,0045 |

  

| Šídák's multiple comparisons test   | Mean Diff. | 95.00% CI of diff. | Below threshold? | Summary | Adjusted P Value |
|-------------------------------------|------------|--------------------|------------------|---------|------------------|
| <b>0 min</b>                        |            |                    |                  |         |                  |
| CB1R vs. CB1R_6D                    | 10,73      | -28,60 to 50,05    | No               | ns      | 0,8251           |
| CB1R vs. CB1R_2D                    | 4,043      | -35,39 to 43,48    | No               | ns      | 0,9881           |
| CB1R vs. CB1R_8D                    | -1,474     | -40,78 to 37,83    | No               | ns      | 0,9994           |
| <b>5 min after WIN stimulation</b>  |            |                    |                  |         |                  |
| CB1R vs. CB1R_6D                    | 29,59      | -9,139 to 68,31    | No               | ns      | 0,1560           |
| CB1R vs. CB1R_2D                    | -10,31     | -49,24 to 28,61    | No               | ns      | 0,8547           |
| CB1R vs. CB1R_8D                    | 27,77      | -10,15 to 65,69    | No               | ns      | 0,1708           |
| <b>15 min after WIN stimulation</b> |            |                    |                  |         |                  |
| CB1R vs. CB1R_6D                    | 26,87      | -11,66 to 65,39    | No               | ns      | 0,2099           |
| CB1R vs. CB1R_2D                    | -10,70     | -49,53 to 28,12    | No               | ns      | 0,8398           |
| CB1R vs. CB1R_8D                    | 29,50      | -8,333 to 67,33    | No               | ns      | 0,1383           |
| <b>30 min after WIN stimulation</b> |            |                    |                  |         |                  |
| CB1R vs. CB1R_6D                    | 14,67      | -16,96 to 46,29    | No               | ns      | 0,5418           |
| CB1R vs. CB1R_2D                    | -11,23     | -40,96 to 18,50    | No               | ns      | 0,6695           |
| CB1R vs. CB1R_8D                    | 19,54      | -10,28 to 49,36    | No               | ns      | 0,2520           |
| <b>60 min after WIN stimulation</b> |            |                    |                  |         |                  |
| CB1R vs. CB1R_6D                    | -11,81     | -53,29 to 29,68    | No               | ns      | 0,8336           |
| CB1R vs. CB1R_2D                    | -35,87     | -75,60 to 3,856    | No               | ns      | 0,0800           |
| CB1R vs. CB1R_8D                    | 5,121      | -35,72 to 45,96    | No               | ns      | 0,9814           |

**B**

**CB1R-YFP + GRK3-Rluc8 – CB1R, CB1R\_2D, CB1R\_6D, CB1R\_8D**

| ANOVA table         | SS    | DF | MS    | F (DFn, DFd)             | P value  |
|---------------------|-------|----|-------|--------------------------|----------|
| Time x CB1R variant | 2412  | 15 | 160,8 | F (15, 160) = 5,586      | P<0,0001 |
| Time                | 37038 | 5  | 7408  | F (2,362, 75,57) = 257,4 | P<0,0001 |
| CB1R variant        | 878,1 | 3  | 292,7 | F (3, 32) = 1,125        | P=0,3534 |

  

| Šídák's multiple comparisons test   | Mean Diff. | 95.00% CI of diff. | Below threshold? | Summary | Adjusted P Value |
|-------------------------------------|------------|--------------------|------------------|---------|------------------|
| <b>0 min</b>                        |            |                    |                  |         |                  |
| CB1R vs. CB1R_2D                    | 3,622      | -2,664 to 9,908    | No               | ns      | 0,3721           |
| CB1R vs. CB1R_6D                    | 2,412      | -3,927 to 8,752    | No               | ns      | 0,6920           |
| CB1R vs. CB1R_8D                    | -2,758     | -8,720 to 3,204    | No               | ns      | 0,5531           |
| <b>5 min after WIN stimulation</b>  |            |                    |                  |         |                  |
| CB1R vs. CB1R_2D                    | 3,850      | -8,120 to 15,82    | No               | ns      | 0,7788           |
| CB1R vs. CB1R_6D                    | 8,043      | -1,332 to 17,42    | No               | ns      | 0,1045           |
| CB1R vs. CB1R_8D                    | 16,93      | 8,586 to 25,27     | Yes              | ***     | 0,0002           |
| <b>10 min after WIN stimulation</b> |            |                    |                  |         |                  |
| CB1R vs. CB1R_2D                    | -4,682     | -16,07 to 6,709    | No               | ns      | 0,6204           |
| CB1R vs. CB1R_6D                    | 2,261      | -5,535 to 10,06    | No               | ns      | 0,8328           |
| CB1R vs. CB1R_8D                    | 9,436      | 2,071 to 16,80     | Yes              | *       | 0,0107           |
| <b>15 min after WIN stimulation</b> |            |                    |                  |         |                  |
| CB1R vs. CB1R_2D                    | -2,805     | -14,03 to 8,416    | No               | ns      | 0,8750           |
| CB1R vs. CB1R_6D                    | 1,579      | -4,991 to 8,149    | No               | ns      | 0,8967           |
| CB1R vs. CB1R_8D                    | 5,608      | -2,182 to 13,40    | No               | ns      | 0,2017           |
| <b>30 min after WIN stimulation</b> |            |                    |                  |         |                  |
| CB1R vs. CB1R_2D                    | -7,898     | -20,18 to 4,386    | No               | ns      | 0,2846           |
| CB1R vs. CB1R_6D                    | -3,031     | -14,31 to 8,248    | No               | ns      | 0,8628           |
| CB1R vs. CB1R_8D                    | -6,091     | -16,65 to 4,464    | No               | ns      | 0,3705           |
| <b>60 min after WIN stimulation</b> |            |                    |                  |         |                  |
| CB1R vs. CB1R_2D                    | -0,4438    | -14,09 to 13,20    | No               | ns      | 0,9997           |
| CB1R vs. CB1R_6D                    | 2,642      | -9,330 to 14,61    | No               | ns      | 0,9149           |
| CB1R vs. CB1R_8D                    | -0,2189    | -15,03 to 14,59    | No               | ns      | >0,9999          |



C

**CB1R-YFP +  $\beta$ -arrestin2-Rluc – CB1R, CB1R\_2D, CB1R\_6D, CB1R\_8D**

| ANOVA table         | SS   | DF | MS    | F (DFn, DFd)             | P value  |
|---------------------|------|----|-------|--------------------------|----------|
| Time x CB1R variant | 3403 | 15 | 226,9 | F (15, 160) = 2,492      | P=0,0025 |
| Time                | 9819 | 5  | 1964  | F (3,235, 103,5) = 21,58 | P<0,0001 |
| CB1R variant        | 3527 | 3  | 1176  | F (3, 32) = 18,21        | P<0,0001 |

| Sidak's multiple comparisons test   | Mean Diff. | 95.00% CI of diff. | Below threshold? | Summary | Adjusted P Value |
|-------------------------------------|------------|--------------------|------------------|---------|------------------|
| <b>0 min</b>                        |            |                    |                  |         |                  |
| CB1R vs. CB1R 2D                    | -2,787     | -9,004 to 3,429    | No               | ns      | 0,5562           |
| CB1R vs. CB1R 6D                    | -3,510     | -11,11 to 4,087    | No               | ns      | 0,5542           |
| CB1R vs. CB1R 8D                    | -1,158     | -7,425 to 5,109    | No               | ns      | 0,9447           |
| <b>5 min after WIN stimulation</b>  |            |                    |                  |         |                  |
| CB1R vs. CB1R 2D                    | 10,46      | 1,223 to 19,69     | Yes              | *       | 0,0255           |
| CB1R vs. CB1R 6D                    | 23,23      | 16,56 to 29,90     | Yes              | ****    | <0,0001          |
| CB1R vs. CB1R 8D                    | 21,76      | 15,12 to 28,40     | Yes              | ****    | <0,0001          |
| <b>10 min after WIN stimulation</b> |            |                    |                  |         |                  |
| CB1R vs. CB1R 2D                    | 14,13      | 4,347 to 23,90     | Yes              | **      | 0,0058           |
| CB1R vs. CB1R 6D                    | 19,73      | 8,405 to 31,06     | Yes              | ***     | 0,0008           |
| CB1R vs. CB1R 8D                    | 19,12      | 8,490 to 29,75     | Yes              | ***     | 0,0007           |
| <b>15 min after WIN stimulation</b> |            |                    |                  |         |                  |
| CB1R vs. CB1R 2D                    | 8,000      | -0,8757 to 16,88   | No               | ns      | 0,0840           |
| CB1R vs. CB1R 6D                    | 10,54      | -0,9145 to 21,99   | No               | ns      | 0,0754           |
| CB1R vs. CB1R 8D                    | 7,805      | -2,337 to 17,95    | No               | ns      | 0,1601           |
| <b>30 min after WIN stimulation</b> |            |                    |                  |         |                  |
| CB1R vs. CB1R 2D                    | -3,095     | -21,14 to 14,95    | No               | ns      | 0,9563           |
| CB1R vs. CB1R 6D                    | 8,065      | -10,38 to 26,51    | No               | ns      | 0,5892           |
| CB1R vs. CB1R 8D                    | 4,101      | -12,88 to 21,08    | No               | ns      | 0,8773           |
| <b>60 min after WIN stimulation</b> |            |                    |                  |         |                  |
| CB1R vs. CB1R 2D                    | 2,852      | -18,69 to 24,39    | No               | ns      | 0,9800           |
| CB1R vs. CB1R 6D                    | 1,108      | -16,31 to 18,52    | No               | ns      | 0,9975           |
| CB1R vs. CB1R 8D                    | 6,264      | -10,34 to 22,87    | No               | ns      | 0,6728           |

**Suppl. table 8.** Statistical analysis of kinetics of presented protein-protein interactions. Curves were compared by two-way ANOVA followed by Sidak's multiple comparison test. If the curves were significantly different, post hoc analysis of time points was performed.
